# Supplementary material
Source: publisher figshare collection journal article supplement (https://gsajournals.figshare.com/articles/dataset/_/24116676)

A

## Gonad disorganization

*Cbr-lin-28(ae39)**Cbr-lin-28(ae39);  
Cbr-lin-46(ae38)*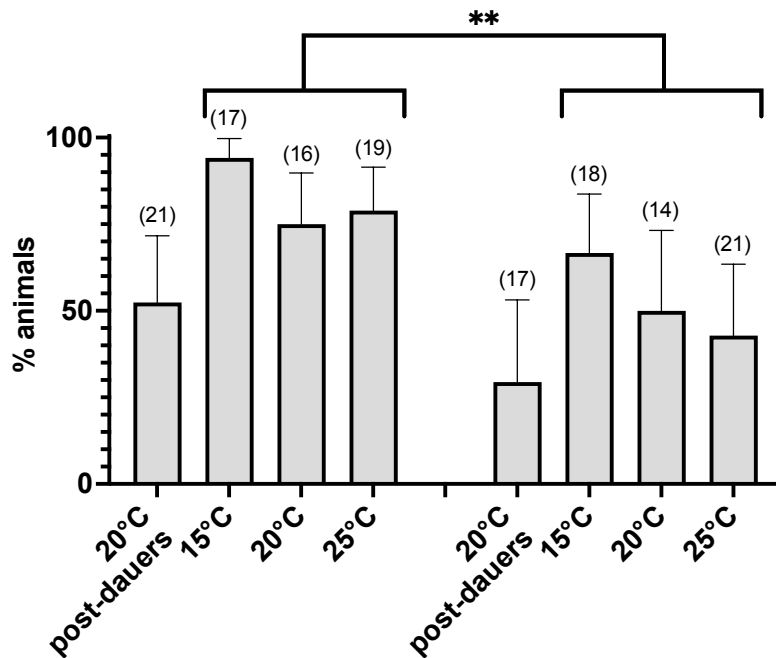

B

## Gonad disorganization progression

*Cbr-lin-28(ae39)**Cbr-lin-28(ae39);  
Cbr-lin-46(ae38)*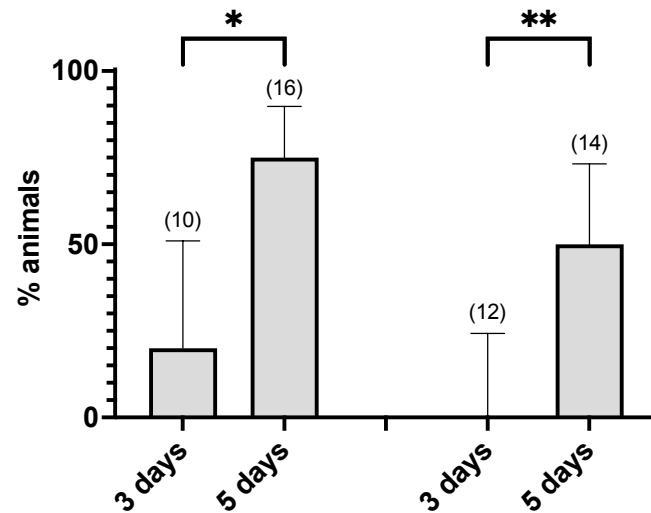

Supplement: Supplementary file 2 [file 1]
