# Supplementary material
Source: publisher figshare collection journal article supplement (https://gsajournals.figshare.com/articles/dataset/_/24116676)

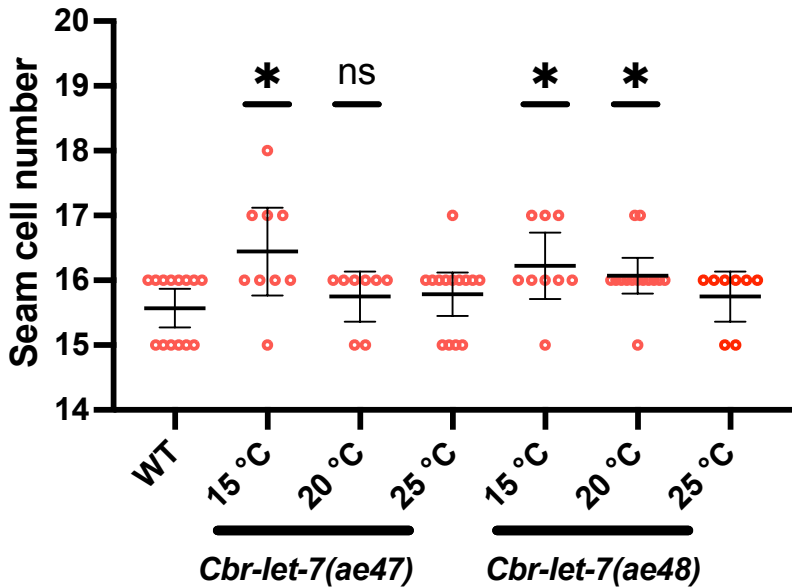

Supplement: Supplementary file 1 [file 1]

20°C

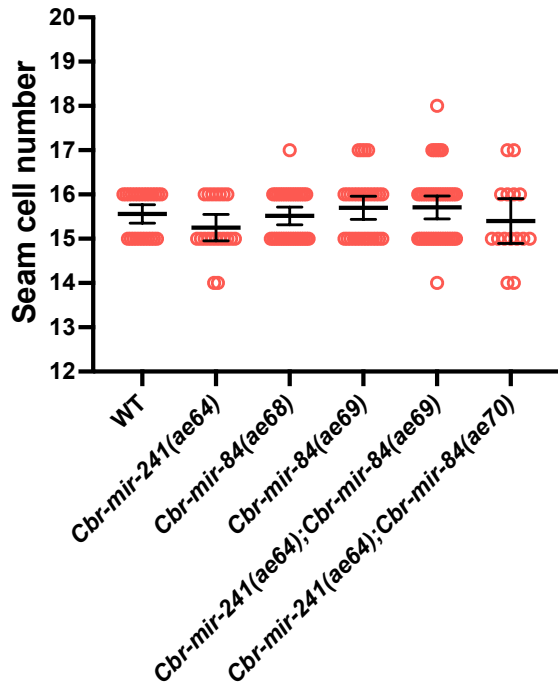

15°C

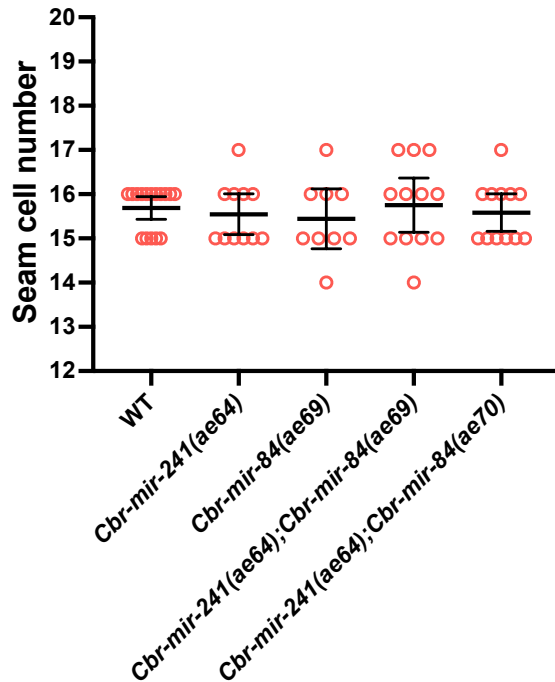

Supplement: Supplementary file 3 [file 1]

# *C. elegans*

# *C. briggsae*

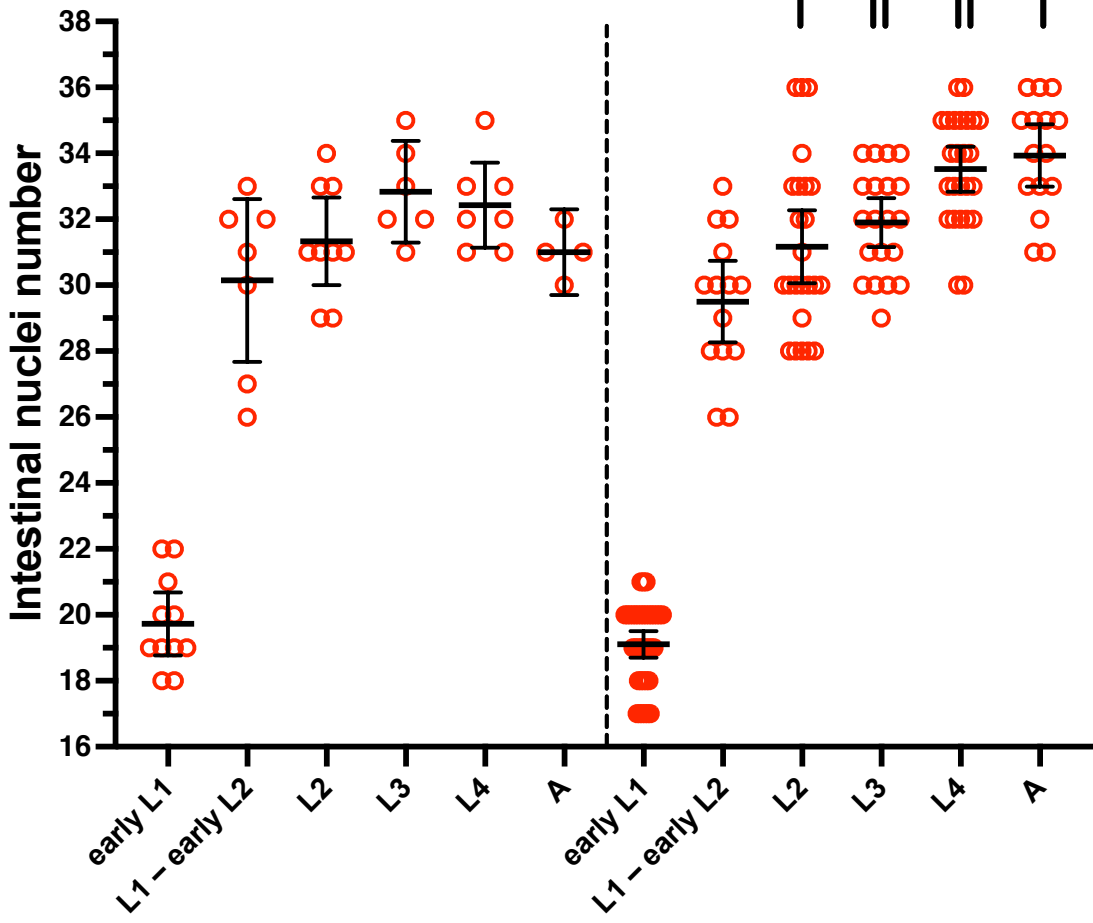

Supplement: Supplementary file 4 [file 1]

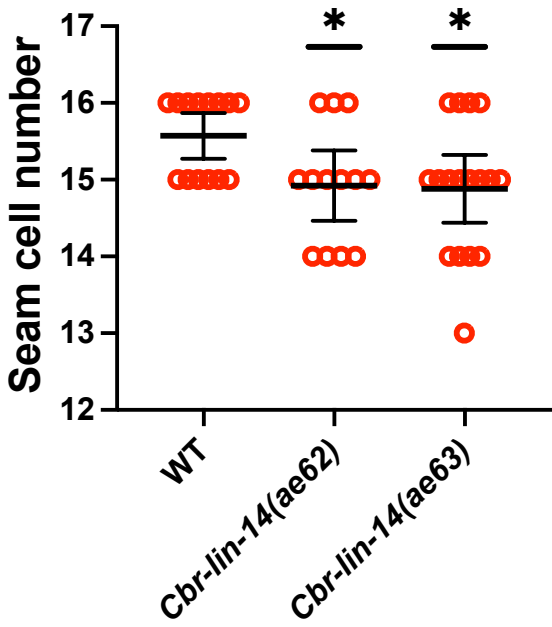

Supplement: Supplementary file 5 [file 1]
